# Supplementary material for: Three-Dimensional Conformal Radiotherapy-Based or Intensity-Modulated Radiotherapy-Based Concurrent Chemoradiotherapy in Patients with Thoracic Esophageal Squamous Cell Carcinoma
Source: PubMed Central journal article supplement (PMC6826542; doi:10.3390/cancers11101529), 2019-10-10
Supplement: cancers-11-01529-s001.pdf [file cancers-11-01529-s001.pdf]

# Supplementary Materials: Three-Dimensional Conformal Radiotherapy-Based or Intensity-Modulated Radiotherapy-Based Concurrent Chemoradiotherapy in Patients with Thoracic Esophageal Squamous Cell Carcinoma

Wei-Cheng Lin, Chia-Lun Chang, Han-Lin Hsu, Kevin Sheng-Po Yuan, Alexander T.H. Wu and Szu-Yuan Wu

**Table S1.** Characteristics of patients with TESCC receiving CCRT with intensity-modulated radiation therapy or three-dimensional conformal radiation therapy (AJCC clinical stages presented with TN system).

| Variables                                           | All      |         | IMRT     |         | 3D-CRT  |         | P value |
|-----------------------------------------------------|----------|---------|----------|---------|---------|---------|---------|
|                                                     | n = 2062 | (%)     | n = 1524 | (%)     | n = 538 | (%)     |         |
| <b>Age</b>                                          |          |         |          |         |         |         |         |
| Mean ± SD                                           | 57.92    | ± 11.00 | 57.85    | ± 10.86 | 58.44   | ± 11.37 | 0.1342  |
| 20-29                                               | 6        | (0.29)  | 4        | (0.26)  | 2       | (0.37)  | 0.5096  |
| 30-39                                               | 55       | (2.67)  | 40       | (2.62)  | 15      | (2.79)  |         |
| 40-49                                               | 472      | (23.09) | 345      | (22.64) | 127     | (23.61) |         |
| 50-59                                               | 714      | (34.82) | 545      | (35.76) | 169     | (31.41) |         |
| 60-69                                               | 500      | (23.97) | 367      | (24.08) | 133     | (24.72) |         |
| 70-79                                               | 240      | (11.45) | 168      | (11.02) | 72      | (13.38) |         |
| 80-89                                               | 72       | (3.52)  | 52       | (3.41)  | 20      | (3.72)  |         |
| 90-100                                              | 3        | (0.14)  | 3        | (0.20)  | 0       | (0.00)  |         |
| <b>Sex</b>                                          |          |         |          |         |         |         |         |
| Male                                                | 1960     | (95.05) | 1447     | (94.95) | 513     | (95.35) | 0.4189  |
| Female                                              | 102      | (4.95)  | 77       | (5.05)  | 25      | (4.65)  |         |
| <b>Follow-up time(year)</b>                         |          |         |          |         |         |         |         |
| Median, IQR                                         | 2.02     | 1.15    | 2.02     | 1.15    | 2.00    | 1.14    | 0.1848  |
| (q1, q3)                                            | (0.92,   | 2.77)   | (0.93,   | 2.78)   | (0.99,  | 2.74)   |         |
| (min, max)                                          | (0.09,   | 7.29)   | (0.09,   | 7.29)   | (0.12,  | 6.96)   |         |
| <b>CCI score</b>                                    |          |         |          |         |         |         |         |
| mean ± SD                                           | 1.25     | ± 1.39  | 1.25     | ± 1.40  | 1.29    | ± 1.34  | 0.4568  |
| 0                                                   | 697      | (34.03) | 533      | (34.97) | 164     | (30.48) | 0.2443  |
| 1                                                   | 721      | (35.10) | 525      | (34.45) | 196     | (36.43) |         |
| 2                                                   | 353      | (16.78) | 253      | (16.60) | 100     | (18.59) |         |
| >3                                                  | 291      | (14.09) | 213      | (13.98) | 78      | (14.50) |         |
| <b>Radiation dose (Gy)</b>                          |          |         |          |         |         |         |         |
| Median, IQR                                         | 50.40    | ± 0.30  | 50.40    | ± 0.31  | 50.40   | ± 0.22  | 0.9617  |
| <b>Cumulative cisplatin dose (mg/m<sup>2</sup>)</b> |          |         |          |         |         |         |         |
| Mean (SD)                                           | 255.57   | ± 57.65 | 255.57   | ± 58.61 | 253.56  | ± 59.16 | 0.1152  |
| <b>Clinical T stages</b>                            |          |         |          |         |         |         |         |
| T1                                                  | 5        | (0.42)  | 5        | (0.33)  | 0       | (0.00)  | <0.0001 |
| T2                                                  | 131      | (6.35)  | 66       | (4.33)  | 65      | (7.43)  |         |
| T3                                                  | 816      | (39.57) | 549      | (36.02) | 267     | (38.48) |         |
| T4                                                  | 1110     | (53.83) | 904      | (59.31) | 206     | (38.28) |         |
| <b>Clinical N stages</b>                            |          |         |          |         |         |         |         |
| N0                                                  | 316      | (15.32) | 218      | (14.30) | 98      | (18.22) | <0.0001 |
| N1                                                  | 401      | (19.44) | 274      | (17.98) | 127     | (23.61) |         |
| N2                                                  | 721      | (34.97) | 543      | (35.63) | 178     | (33.09) |         |
| N3                                                  | 624      | (30.26) | 489      | (32.09) | 135     | (25.09) |         |
| <b>Year of diagnosis</b>                            |          |         |          |         |         |         |         |
| 2006-2010                                           | 798      | (39.08) | 450      | (29.53) | 348     | (64.68) | <0.0001 |
| 2011-2014                                           | 1264     | (60.92) | 1074     | (70.47) | 190     | (35.32) |         |
| <b>Toxicity profile</b>                             |          |         |          |         |         |         |         |
| Major heart events                                  | 58       | (2.81)  | 41       | (2.69)  | 17      | (3.16)  | 0.5687  |

|                               |      |         |      |         |     |         |
|-------------------------------|------|---------|------|---------|-----|---------|
| Radiation pneumonitis grade 2 | 465  | (22.55) | 334  | (21.92) | 122 | (22.67) |
| <b>Death</b>                  |      |         |      |         |     | <0.0001 |
| No                            | 454  | (21.84) | 372  | (24.41) | 82  | (15.24) |
| Yes                           | 1608 | (78.16) | 1152 | (75.59) | 456 | (84.76) |

CCRT, concurrent chemoradiotherapy; CCI, Charlson comorbidity index; RT, radiotherapy; CCRT, concurrent chemoradiotherapy; AJCC, American Joint Committee on Cancer; ref, reference; IMRT, intensity-modulated radiation therapy; IQR, interquartile range; SD, standard deviation; Gy, Gray; 3D-CRT, three-dimensional conformal radiation therapy.

**Table S2.** Cox proportional hazard regression analysis of mortality risk among patients with TESCC receiving CCRT (AJCC clinical stages presented with TN system).

| Variable                 | HR   | Univariate analysis |         |      | Multivariate analysis |         |  |
|--------------------------|------|---------------------|---------|------|-----------------------|---------|--|
|                          |      | 95% CI              | P       | aHR* | 95% CI                | P       |  |
| <b>RT Modalities</b>     |      |                     |         |      |                       |         |  |
| 3D-CRT (ref)             | 1    |                     |         | 1    |                       |         |  |
| IMRT                     | 0.89 | (0.80, 0.99)        | 0.0372  | 0.86 | (0.75, 0.91)          | 0.0116  |  |
| <b>Sex</b>               |      |                     |         |      |                       |         |  |
| Female (ref)             | 1    |                     |         | 1    |                       |         |  |
| Male                     | 1.12 | (0.89, 1.40)        | 0.3378  | 1.04 | (0.91, 1.36)          | 0.5729  |  |
| <b>Age</b>               |      |                     |         |      |                       |         |  |
| 20-29 (ref)              | 1    |                     |         | 1    |                       |         |  |
| 30-39                    | 2.07 | (0.29, 14.86)       | 0.4680  | 2.24 | (0.41, 16.59)         | 0.3987  |  |
| 40-49                    | 2.25 | (0.32, 15.88)       | 0.4149  | 2.33 | (0.37, 16.75)         | 0.4613  |  |
| 50-59                    | 1.79 | (0.25, 12.59)       | 0.5600  | 1.74 | (0.34, 13.91)         | 0.4847  |  |
| 60-69                    | 1.65 | (0.23, 11.65)       | 0.6141  | 1.75 | (0.28, 11.61)         | 0.6538  |  |
| 70-79                    | 1.62 | (0.23, 11.42)       | 0.6311  | 1.87 | (0.25, 13.87)         | 0.6140  |  |
| 80-89                    | 1.92 | (0.27, 13.76)       | 0.5144  | 2.15 | (0.35, 13.40)         | 0.5215  |  |
| 90-                      | 2.14 | (0.23, 20.44)       | 0.5075  | 3.01 | (0.52, 27.61)         | 0.4184  |  |
| <b>CCI score</b>         |      |                     |         |      |                       |         |  |
| 0 (ref)                  | 1    |                     |         | 1    |                       |         |  |
| 1                        | 0.98 | (0.87, 1.11)        | 0.7628  | 1.03 | (0.92, 1.11)          | 0.8313  |  |
| 2                        | 0.94 | (0.81, 1.08)        | 0.3725  | 1.01 | (0.89, 1.08)          | 0.8927  |  |
| >3                       | 0.96 | (0.83, 1.12)        | 0.6291  | 1.09 | (0.96, 1.32)          | 0.1267  |  |
| <b>Year of diagnosis</b> |      |                     |         |      |                       |         |  |
| 2006-2010 (ref)          | 1    |                     |         | 1    |                       |         |  |
| 2011-2014                | 0.96 | (0.87, 1.07)        | 0.4678  | 0.97 | (0.89, 1.09)          | 0.5830  |  |
| <b>Clinical T stages</b> |      |                     |         |      |                       |         |  |
| T1 (ref)                 | 1    |                     |         | 1    |                       |         |  |
| T2                       | 1.03 | (0.77, 1.13)        | 0.8537  | 1.02 | (0.94, 1.12)          | 0.8735  |  |
| T3                       | 1.23 | (1.08, 1.15)        | 0.0231  | 1.19 | (1.04, 1.25)          | 0.0345  |  |
| T4                       | 1.96 | (1.35, 2.43)        | <0.0001 | 1.94 | (1.34, 2.23)          | <0.0001 |  |
| <b>Clinical N stages</b> |      |                     |         |      |                       |         |  |
| N0 (ref)                 | 1    |                     |         | 1    |                       |         |  |
| N1                       | 1.08 | (1.04, 1.23)        | 0.0342  | 1.12 | (1.09, 1.21)          | 0.0342  |  |
| N2                       | 1.41 | (1.27, 1.97)        | <0.0001 | 1.39 | (1.29, 2.08)          | <0.0001 |  |
| N3                       | 2.16 | (1.71, 2.26)        | <0.0001 | 1.99 | (1.87, 2.43)          | <0.0001 |  |

\*All variables were used in multivariate analysis. HR, hazard ratio; CI, confidence interval; aHR, adjusted hazard ratio. CCRT, concurrent chemoradiotherapy; CCI, Charlson comorbidity index; RT, radiotherapy; CCRT, concurrent chemoradiotherapy; AJCC, American Joint Committee on Cancer; ref, reference group; IMRT, intensity-modulated radiation therapy; 3D-CRT, three-dimensional conformal radiation therapy.

**Table S3.** T and N-stage-stratified Cox proportional hazards model for mortality risk associated with treatment modalities in patients with TESCC receiving CCRT.

| Treatment                       | n           | death       | death rate (%) | Univariate analysis |              |         | Multivariate analysis |              |         |
|---------------------------------|-------------|-------------|----------------|---------------------|--------------|---------|-----------------------|--------------|---------|
|                                 |             |             |                | HR                  | 95% CI       | P value | aHR*                  | 95% CI       | P value |
| <b>All stage</b>                | <u>2062</u> | <u>1608</u> |                |                     |              |         |                       |              |         |
| 3D-CRT                          | 538         | 456         | 84.76          | 1                   |              |         | 1                     |              |         |
| IMRT                            | 1524        | 1152        | 75.59          | 0.89                | (0.80, 0.99) | 0.0372  | 0.86                  | (0.75, 0.91) | 0.0116  |
| <b>Early T stage (T1-T2)</b>    | <u>136</u>  | <u>81</u>   |                |                     |              |         |                       |              |         |
| 3D-CRT                          | 65          | 39          | 60.00          | 1                   |              |         | 1                     |              |         |
| IMRT                            | 71          | 42          | 59.15          | 0.99                | (0.71, 2.32) | 0.8677  | 0.98                  | (0.77, 2.25) | 0.9854  |
| <b>Advanced T stage (T3-T4)</b> | <u>1926</u> | <u>1527</u> |                |                     |              |         |                       |              |         |

|                                 |             |             |       |      |              |        |      |              |        |
|---------------------------------|-------------|-------------|-------|------|--------------|--------|------|--------------|--------|
| 3D-CRT                          | 473         | 402         | 84.99 | 1    |              |        | 1    |              |        |
| IMRT                            | 1453        | 1125        | 77.43 | 0.84 | (0.74, 0.91) | 0.0037 | 0.86 | (0.74, 0.96) | 0.0277 |
| <b>Early N stage (N0)</b>       | <b>316</b>  | <b>218</b>  |       |      |              |        |      |              |        |
| 3D-CRT                          | 98          | 68          | 69.39 | 1    |              |        | 1    |              |        |
| IMRT                            | 218         | 150         | 68.81 | 0.89 | (0.68, 1.98) | 0.4344 | 0.91 | (0.67, 1.95) | 0.5746 |
| <b>Advanced N stage (N1-N3)</b> | <b>1746</b> | <b>1390</b> |       |      |              |        |      |              |        |
| 3D-CRT                          | 440         | 391         | 88.86 | 1    |              |        | 1    |              |        |
| IMRT                            | 1306        | 999         | 76.49 | 0.81 | (0.71, 0.92) | 0.0015 | 0.83 | (0.74, 0.94) | 0.0140 |

\*All variables in Supplemental Table 2 were used in multivariate analysis. HR, hazard ratio; CI, confidence interval; aHR, adjusted hazard ratio. CCRT, concurrent chemoradiotherapy; CCI, Charlson comorbidity index; RT, radiotherapy; CCRT, concurrent chemoradiotherapy; AJCC, American Joint Committee on Cancer; ref, reference group; IMRT, intensity-modulated radiation therapy; 3D-CRT, three-dimensional conformal radiation therapy.

**Table S4. Characteristics of patients with TESSC receiving CCRT with IMRT or 3D-CRT and their propensity score-matched cohort.**

| Variables                                           | All      |         | IMRT    |         | 3D-CRT  |         | P value |
|-----------------------------------------------------|----------|---------|---------|---------|---------|---------|---------|
|                                                     | n = 1076 | (%)     | n = 538 | (%)     | n = 538 | (%)     |         |
| <b>Age</b>                                          |          |         |         |         |         |         |         |
| Mean±SD                                             | 58.51    | ±10.62  | 58.58   | ±9.86   | 58.44   | ±11.37  | 0.8289  |
|                                                     |          |         |         |         |         |         | 1.0000  |
| 20-29                                               | 4        | (0.37)  | 2       | (0.37)  | 2       | (0.37)  |         |
| 30-39                                               | 30       | (2.79)  | 15      | (2.79)  | 15      | (2.79)  |         |
| 40-49                                               | 254      | (23.61) | 127     | (23.61) | 127     | (23.61) |         |
| 50-59                                               | 338      | (31.41) | 169     | (31.41) | 169     | (31.41) |         |
| 60-69                                               | 266      | (24.72) | 133     | (24.72) | 133     | (24.72) |         |
| 70-79                                               | 240      | (13.38) | 72      | (13.38) | 72      | (13.38) |         |
| 80-89                                               | 144      | (3.72)  | 20      | (3.72)  | 20      | (3.72)  |         |
| 90-100                                              | 0        | (0.00)  | 0       | (0.00)  | 0       | (0.00)  |         |
| <b>Sex</b>                                          |          |         |         |         |         |         | 1.0000  |
| Male                                                | 1026     | (95.35) | 513     | (95.35) | 513     | (95.35) |         |
| Female                                              | 50       | (4.65)  | 25      | (4.65)  | 25      | (4.65)  |         |
| <b>Follow-up time (year)</b>                        |          |         |         |         |         |         | 0.4418  |
| Median, IQR                                         | 2.02     | 1.14    | 2.04    | 1.14    | 2.00    | 1.14    |         |
| (q1, q3)                                            | (0.99,   | 2.73)   | (0.98,  | 2.77)   | (0.99,  | 2.74)   |         |
| (min, max)                                          | (0.09,   | 6.69)   | (0.09,  | 6.29)   | (0.12,  | 6.96)   |         |
| <b>CCI score</b>                                    |          |         |         |         |         |         |         |
| mean±SD                                             | 1.29     | ±1.34   | 1.29    | ±1.34   | 1.29    | ±1.34   | 1.0000  |
| 0                                                   | 328      | (30.48) | 164     | (30.48) | 164     | (30.48) | 1.0000  |
| 1                                                   | 392      | (36.43) | 196     | (36.43) | 196     | (36.43) |         |
| 2                                                   | 200      | (18.59) | 100     | (18.59) | 100     | (18.59) |         |
| >3                                                  | 156      | (14.50) | 78      | (14.50) | 78      | (14.50) |         |
| <b>Radiation dose (Gy)</b>                          |          |         |         |         |         |         | 1.000   |
| Median, IQR                                         | 50.40    | ±0.21   | 50.40   | ±0.21   | 50.40   | ±0.22   |         |
| <b>Cumulative cisplatin dose (mg/m<sup>2</sup>)</b> |          |         |         |         |         |         | 0.6970  |
| Mean (SD)                                           | 253.77   | ±59.39  | 254.97  | ±59.61  | 253.56  | ±59.16  |         |
| <b>AJCC clinical stages</b>                         |          |         |         |         |         |         | 1.0000  |
| Early stage (IA-IIIB)                               | 208      | (19.33) | 104     | (19.33) | 104     | (19.33) |         |
| Advanced stage (IIIA-IIIC)                          | 868      | (80.67) | 434     | (80.67) | 434     | (80.67) |         |
| <b>AJCC clinical stages</b>                         |          |         |         |         |         |         | 1.0000  |
| IA                                                  | 0        | (0.00)  | 0       | (0.00)  | 0       | (0.00)  |         |
| IB                                                  | 14       | (1.30)  | 7       | (1.30)  | 7       | (1.30)  |         |
| IIA                                                 | 94       | (8.74)  | 47      | (8.74)  | 47      | (8.74)  |         |
| IIB                                                 | 100      | (9.29)  | 50      | (9.29)  | 50      | (9.29)  |         |
| IIIA                                                | 156      | (14.50) | 78      | (14.50) | 78      | (14.50) |         |
| IIIB                                                | 438      | (40.71) | 219     | (40.71) | 219     | (40.71) |         |
| IIIC                                                | 274      | (25.46) | 137     | (25.46) | 137     | (25.46) |         |
| <b>Year of diagnosis</b>                            |          |         |         |         |         |         | 1.0000  |
| 2006-2010                                           | 696      | (64.68) | 348     | (64.68) | 348     | (64.68) |         |
| 2011-2014                                           | 380      | (35.32) | 190     | (35.32) | 190     | (35.32) |         |
| <b>Death</b>                                        |          |         |         |         |         |         | <0.0001 |
| No                                                  | 214      | (19.89) | 132     | (24.54) | 82      | (15.24) |         |
| Yes                                                 | 862      | (80.11) | 406     | (75.46) | 456     | (84.76) |         |

CCRT, concurrent chemoradiotherapy; CCI, Charlson comorbidity index; RT, radiotherapy; CCRT, concurrent chemoradiotherapy; AJCC, American Joint Committee on Cancer; ref, reference; IMRT, intensity-modulated radiation therapy; IQR, interquartile range; SD, standard deviation; Gy, Gray; 3D-CRT, three-dimensional conformal radiation therapy.

**Table S5. Cox proportional hazard regression model for mortality risk among patients with TESCC receiving CCRT in their propensity score-matched cohort.**

| Variable                    | Univariate analysis |        |        | Multivariate analysis |      |        |        |         |
|-----------------------------|---------------------|--------|--------|-----------------------|------|--------|--------|---------|
|                             | HR                  | 95% CI |        | P                     | aHR* | 95% CI |        | P       |
| <b>RT Modalities</b>        |                     |        |        |                       |      |        |        |         |
| 3D-CRT (ref)                | 1                   |        |        |                       | 1    |        |        |         |
| IMRT                        | 0.86                | (0.78, | 0.93)  | 0.0172                | 0.85 | (0.76, | 0.91)  | 0.00231 |
| <b>Sex</b>                  |                     |        |        |                       |      |        |        |         |
| Female (ref)                | 1                   |        |        |                       | 1    |        |        |         |
| Male                        | 1.03                | (0.90, | 1.09)  | 0.9989                | 1.02 | (0.94, | 1.08)  | 0.9990  |
| <b>Age</b>                  |                     |        |        |                       |      |        |        |         |
| 20-29 (ref)                 | 1                   |        |        |                       | 1    |        |        |         |
| 30-39                       | 0.96                | (0.61, | 10.20) | 0.3804                | 1.02 | (0.41, | 9.82)  | 0.5017  |
| 40-49                       | 1.05                | (0.76, | 11.42) | 0.3351                | 1.03 | (0.77, | 10.50) | 0.4846  |
| 50-59                       | 1.08                | (0.49, | 8.15)  | 0.4599                | 1.06 | (0.51, | 8.12)  | 0.4865  |
| 60-69                       | 1.12                | (0.67, | 7.21)  | 0.5252                | 1.11 | (0.68, | 7.01)  | 0.6736  |
| 70-79                       | 1.13                | (0.77, | 7.06)  | 0.5222                | 1.12 | (0.78, | 7.04)  | 0.6362  |
| 80-89                       | 1.14                | (0.63, | 9.92)  | 0.4955                | 1.12 | (0.67, | 9.91)  | 0.5532  |
| <b>CCI score</b>            |                     |        |        |                       |      |        |        |         |
| 0 (ref)                     | 1                   |        |        |                       | 1    |        |        |         |
| 1                           | 1.07                | (0.84, | 1.21)  | 0.5517                | 1.04 | (0.88, | 1.19)  | 0.6524  |
| 2                           | 1.08                | (0.85, | 1.25)  | 0.4836                | 1.14 | (0.89, | 1.24)  | 0.6850  |
| >3                          | 1.13                | (0.87, | 1.42)  | 0.4289                | 1.16 | (0.91, | 1.33)  | 0.4752  |
| <b>Year of diagnosis</b>    |                     |        |        |                       |      |        |        |         |
| 2006-2010 (ref)             | 1                   |        |        |                       | 1    |        |        |         |
| 2011-2014                   | 0.93                | (0.87, | 1.04)  | 0.8978                | 0.91 | (0.87, | 1.05)  | 0.8241  |
| <b>AJCC clinical stages</b> |                     |        |        |                       |      |        |        |         |
| Early stage (ref)           | 1                   |        |        |                       | 1    |        |        |         |
| Advanced stage              | 1.28                | (0.48, | 1.57)  | 0.5047                | 1.89 | (.51,  | 1.63)  | 0.4955  |

\*All variables were used in multivariate analysis. HR, hazard ratio; CI, confidence interval; aHR, adjusted hazard ratio. CCRT, concurrent chemoradiotherapy; CCI, Charlson comorbidity index; RT, radiotherapy; CCRT, concurrent chemoradiotherapy; AJCC, American Joint Committee on Cancer; ref, reference group; IMRT, intensity-modulated radiation therapy; 3D-CRT, three-dimensional conformal radiation therapy.

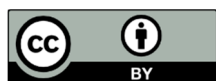

© 2019 by the authors. Licensee MDPI, Basel, Switzerland. This article is an open access article distributed under the terms and conditions of the Creative Commons Attribution (CC BY) license (<http://creativecommons.org/licenses/by/4.0/>).
